# Supplementary material for: Stretched or wrinkled? Looking into the polymer conformation within polymersome membranes
Source: Royal Society of Chemistry journal article supplement (doi:10.1039/d4sm00239c), 2024-01-01
Supplement: d4sm00239c1.pdf [file d4sm00239c1.pdf]

b - bonds per repeating unit  
n - repeating units  
d - bond length  
 $\theta$  - tetrahedral bond angle  
 $R_{\text{contour}}$  - fully stretched conformation  
 $R_{\text{coil}}$  - end-to-end distance in a random coil  
 $R_{\text{eff}}$  - effective length  
m - membrane thickness  
x - degree of stretching

$$L_{\text{contour}} = b * n * d * \sin\left(\frac{\theta}{2}\right)$$

$$L_{\text{coil}} = \sqrt{(1 - \cos \theta) / (1 + \cos \theta) * b * n * d}$$

$$L_{\text{eff}} = x * L_{\text{contour}} + (1 - x) * L_{\text{coil}}$$

$$L_{\text{eff}} = \frac{m}{2}$$

$$x = \frac{L_{\text{eff}} - L_{\text{coil}}}{L_{\text{contour}} - L_{\text{coil}}}$$

| Reference in paper  | Polymer                                           | b | n   | n (hphop) | $\theta$ [°] | d [nm] | $L_{\text{contour}}$ [nm] | $L_{\text{coil}}$ [nm] | m [nm] | $L_{\text{eff}}$ [nm] | x [%] |
|---------------------|---------------------------------------------------|---|-----|-----------|--------------|--------|---------------------------|------------------------|--------|-----------------------|-------|
| <b>AB-Diblock</b>   |                                                   |   |     |           |              |        |                           |                        |        |                       |       |
| PMDS-based polymers |                                                   |   |     |           |              |        |                           |                        |        |                       |       |
| 18                  | PDMS <sub>14</sub> -b-PEO <sub>8</sub>            | 2 | 14  | 28        | 126,5        | 0,162  | 4,05                      | 1,70                   | 7,1    | 3,6                   | 79    |
| 18                  | PDMS <sub>23</sub> -b-PEO <sub>13</sub>           | 2 | 23  | 46        | 126,5        | 0,162  | 6,65                      | 2,18                   | 8,6    | 4,3                   | 47    |
| 18                  | PDMS <sub>27</sub> -b-PEO <sub>17</sub>           | 2 | 27  | 54        | 126,5        | 0,162  | 7,81                      | 2,36                   | 10     | 5,0                   | 48    |
| 18                  | PDMS <sub>36</sub> -b-PEO <sub>23</sub>           | 2 | 36  | 72        | 126,5        | 0,162  | 10,42                     | 2,73                   | 13,1   | 6,6                   | 50    |
| 19                  | PMOXA <sub>6</sub> -PDMS <sub>22</sub>            | 2 | 22  | 44        | 126,5        | 0,162  | 6,37                      | 2,13                   | 10,9   | 5,5                   | 78    |
| 19                  | PMOXA <sub>9</sub> -PDMS <sub>31</sub>            | 2 | 31  | 62        | 126,5        | 0,162  | 8,97                      | 2,53                   | 14,3   | 7,2                   | 72    |
| 19                  | PMOXA <sub>8</sub> -PDMS <sub>39</sub>            | 2 | 39  | 78        | 126,5        | 0,162  | 11,28                     | 2,84                   | 16     | 8,0                   | 61    |
| 19                  | PMOXA <sub>14</sub> -PDMS <sub>65</sub>           | 2 | 65  | 130       | 126,5        | 0,162  | 18,81                     | 3,66                   | 21,3   | 10,7                  | 46    |
| 21                  | PMOXA <sub>11</sub> -b-PDMS <sub>68</sub>         | 2 | 68  | 136       | 126,5        | 0,162  | 19,67                     | 3,75                   | 16     | 8,0                   | 27    |
| No heteroatoms      |                                                   |   |     |           |              |        |                           |                        |        |                       |       |
| 3,22,23             | PEO <sub>40</sub> -PEE <sub>37</sub>              | 2 | 37  | 74        | 109,5        | 0,145  | 8,76                      | 1,76                   | 8      | 4,0                   | 32    |
| 23                  | PEO <sub>26</sub> -PBD <sub>46</sub>              | 2 | 46  | 92        | 109,5        | 0,145  | 10,89                     | 1,97                   | 9,6    | 4,8                   | 32    |
| 22,23               | PEO <sub>50</sub> -PBD <sub>55</sub>              | 2 | 55  | 110       | 109,5        | 0,145  | 13,03                     | 2,15                   | 10,6   | 5,3                   | 29    |
| 22,23               | PEO <sub>80</sub> -PBD <sub>125</sub>             | 2 | 125 | 250       | 109,5        | 0,145  | 29,60                     | 3,24                   | 14,8   | 7,4                   | 16    |
| 23                  | PEO <sub>150</sub> -PBD <sub>250</sub>            | 2 | 250 | 500       | 109,5        | 0,145  | 59,21                     | 4,59                   | 21     | 10,5                  | 11    |
| PEO derivative      |                                                   |   |     |           |              |        |                           |                        |        |                       |       |
| 14                  | (R/S)-PBO <sub>26</sub> -b-(R/S)-PG <sub>14</sub> | 3 | 26  | 78        | 109,5        | 0,145  | 9,24                      | 1,81                   | 11,1   | 5,6                   | 50    |
| 14                  | (R)-PBO <sub>26</sub> -b-(R)-PG <sub>14</sub>     | 3 | 26  | 78        | 109,5        | 0,145  | 9,24                      | 1,81                   | 11,6   | 5,8                   | 54    |
| 14                  | (S)-PBO <sub>27</sub> -b-(S)-PG <sub>14</sub>     | 3 | 27  | 81        | 109,5        | 0,145  | 9,59                      | 1,85                   | 11     | 5,5                   | 47    |
| 24                  | PEG <sub>17</sub> -SS-PPS <sub>30</sub>           | 3 | 30  | 90        | 109,5        | 0,162  | 11,91                     | 2,17                   | 9      | 4,5                   | 24    |

|    |                                           |   |     |     |       |       |       |      |      |      |    |
|----|-------------------------------------------|---|-----|-----|-------|-------|-------|------|------|------|----|
| 16 | PEO <sub>45</sub> -b-PEHOx <sub>95</sub>  | 3 | 95  | 285 | 109,5 | 0,162 | 37,70 | 3,87 | 17,9 | 9,0  | 15 |
| 16 | PEO <sub>45</sub> -b-PEHOx <sub>128</sub> | 3 | 128 | 384 | 109,5 | 0,162 | 50,80 | 4,49 | 25,1 | 12,6 | 17 |

#### Bulky side chain in hydrophobic block

|       |                                                 |   |    |    |       |       |      |      |      |     |     |
|-------|-------------------------------------------------|---|----|----|-------|-------|------|------|------|-----|-----|
| 25    | PEG <sub>45</sub> -b-PA444 <sub>7</sub>         | 2 | 7  | 14 | 109,5 | 0,145 | 1,66 | 0,77 | 6    | 3,0 | 251 |
| 26,27 | PEG <sub>45</sub> -b-PA444 <sub>7</sub>         | 2 | 7  | 14 | 109,5 | 0,145 | 1,66 | 0,77 | 10,5 | 5,3 | 504 |
| 26,27 | PEG <sub>45</sub> -b-PMAazo444 <sub>12</sub>    | 2 | 12 | 24 | 109,5 | 0,145 | 2,84 | 1,01 | 14,5 | 7,3 | 340 |
| 26    | PEG <sub>45</sub> -b-PA6ester1 <sub>20</sub>    | 2 | 21 | 42 | 109,5 | 0,145 | 4,97 | 1,33 | 10   | 5,0 | 101 |
| 26    | PEG <sub>91</sub> -b-(PB <sub>33</sub> -g-Chol) | 2 | 33 | 66 | 109,5 | 0,145 | 7,82 | 1,67 | 13,5 | 6,8 | 83  |

#### High Tg/Tm polymers

|    |                                          |   |     |      |       |       |        |      |      |      |    |
|----|------------------------------------------|---|-----|------|-------|-------|--------|------|------|------|----|
| 28 | PEG <sub>45</sub> -b-PS <sub>206</sub>   | 2 | 206 | 412  | 109,5 | 0,145 | 48,79  | 4,16 | 22   | 11,0 | 15 |
| 29 | PEG <sub>45</sub> -b-PS <sub>230</sub>   | 2 | 230 | 460  | 109,5 | 0,145 | 54,47  | 4,40 | 26   | 13,0 | 17 |
| 30 | PEG <sub>44</sub> -b-PS <sub>292</sub>   | 2 | 292 | 584  | 109,5 | 0,145 | 69,15  | 4,96 | 26   | 13,0 | 13 |
| 31 | PEG <sub>45</sub> -PCL <sub>44</sub>     | 7 | 44  | 308  | 109,5 | 0,145 | 36,47  | 3,60 | 17,5 | 8,8  | 16 |
| 32 | PEG <sub>45</sub> -b-PTMC <sub>96</sub>  | 6 | 96  | 576  | 109,5 | 0,145 | 68,21  | 4,92 | 14,6 | 7,3  | 4  |
| 32 | PEG <sub>45</sub> -b-PTMC <sub>144</sub> | 6 | 144 | 864  | 109,5 | 0,145 | 102,31 | 6,03 | 17,5 | 8,8  | 3  |
| 32 | PEG <sub>45</sub> -b-PTMC <sub>170</sub> | 6 | 170 | 1020 | 109,5 | 0,145 | 120,78 | 6,55 | 19,2 | 9,6  | 3  |

#### Non-bulky (meth)acrylates

|    |                                                                     |   |    |     |       |       |       |      |      |     |     |
|----|---------------------------------------------------------------------|---|----|-----|-------|-------|-------|------|------|-----|-----|
| 33 | PEG <sub>43</sub> -b-P(NIPAM <sub>21</sub> -co-PDMI <sub>9</sub> )  | 2 | 30 | 60  | 109,5 | 0,145 | 7,10  | 1,59 | 8    | 4,0 | 44  |
| 33 | PEG <sub>43</sub> -b-P(NIPAM <sub>21</sub> -co-PDMI <sub>9</sub> )  | 2 | 30 | 60  | 109,5 | 0,145 | 7,10  | 1,59 | 9,6  | 4,8 | 58  |
| 33 | PEG <sub>43</sub> -b-P(NIPAM <sub>21</sub> -co-PDMI <sub>9</sub> )  | 2 | 30 | 60  | 109,5 | 0,145 | 7,10  | 1,59 | 10,9 | 5,5 | 70  |
| 33 | PEG <sub>43</sub> -b-P(NIPAM <sub>21</sub> -co-PDMI <sub>9</sub> )  | 2 | 30 | 60  | 109,5 | 0,145 | 7,10  | 1,59 | 14,3 | 7,2 | 101 |
| 34 | PEG <sub>43</sub> -b-P(NIPAM <sub>23</sub> -co-PDMI <sub>19</sub> ) | 2 | 42 | 84  | 109,5 | 0,145 | 9,95  | 1,88 | 10   | 5,0 | 39  |
| 35 | PNAM <sub>25</sub> -b-PNAT <sub>25</sub>                            | 2 | 25 | 50  | 109,5 | 0,145 | 5,92  | 1,45 | 12,9 | 6,5 | 112 |
| 35 | PNAM <sub>25</sub> -b-PNAT <sub>50</sub>                            | 2 | 50 | 100 | 109,5 | 0,145 | 11,84 | 2,05 | 17,2 | 8,6 | 67  |
| 35 | PNAM <sub>25</sub> -b-PNAT <sub>70</sub>                            | 2 | 70 | 140 | 109,5 | 0,145 | 16,58 | 2,43 | 19,3 | 9,7 | 51  |
| 36 | PEG <sub>45</sub> -b-PMesPG <sub>17</sub>                           | 3 | 17 | 51  | 109,5 | 0,145 | 6,04  | 1,47 | 9    | 4,5 | 66  |
| 36 | PEG <sub>45</sub> -b-PMesPG <sub>71</sub>                           | 3 | 71 | 213 | 109,5 | 0,145 | 25,22 | 2,99 | 13   | 6,5 | 16  |
| 37 | PEG <sub>16</sub> -b-PMA <sub>70</sub>                              | 2 | 70 | 140 | 109,5 | 0,145 | 16,58 | 2,43 | 12,4 | 6,2 | 27  |
| 37 | PEG <sub>45</sub> -b-PMA <sub>70</sub>                              | 2 | 70 | 140 | 109,5 | 0,145 | 16,58 | 2,43 | 11,1 | 5,6 | 22  |
| 37 | PAA <sub>10</sub> -b-PMA <sub>70</sub>                              | 2 | 70 | 140 | 109,5 | 0,145 | 16,58 | 2,43 | 10,9 | 5,5 | 21  |

#### PEG-PDEA derivatives

|    |                                                                                               |   |    |     |       |       |       |      |      |     |    |
|----|-----------------------------------------------------------------------------------------------|---|----|-----|-------|-------|-------|------|------|-----|----|
| 38 | PEG <sub>45</sub> -b-P(DEAEMA <sub>36</sub> -co-TPEMA <sub>6</sub> )                          | 2 | 42 | 84  | 109,5 | 0,145 | 9,95  | 1,88 | 14,7 | 7,4 | 68 |
| 39 | PEG <sub>45</sub> -b-P(FcMA <sub>17</sub> -co-DEAEMA <sub>48</sub> -co-DMIHMA <sub>16</sub> ) | 2 | 81 | 162 | 109,5 | 0,145 | 19,18 | 2,61 | 14   | 7,0 | 26 |

|    |                                                                                                   |   |     |     |       |       |       |      |      |      |    |
|----|---------------------------------------------------------------------------------------------------|---|-----|-----|-------|-------|-------|------|------|------|----|
| 40 | PEG <sub>45</sub> -b-P(DPAMA <sub>59</sub> -co-DMIHMA <sub>24</sub> )                             | 2 | 83  | 166 | 109,5 | 0,145 | 19,66 | 2,64 | 19,5 | 9,8  | 42 |
| 41 | PEG <sub>45</sub> -b-P(DPAEMA <sub>57</sub> -co-DMIHMA <sub>27</sub> )                            | 2 | 84  | 168 | 109,5 | 0,145 | 19,89 | 2,66 | 26,9 | 13,5 | 63 |
| 41 | PEG <sub>45</sub> -b-P(DEAEMA <sub>70</sub> -DMIBMA <sub>20</sub> )                               | 2 | 90  | 180 | 109,5 | 0,145 | 21,31 | 2,75 | 16,1 | 8,1  | 29 |
| 42 | PEG <sub>45</sub> -b-P(DEAMA <sub>73</sub> -S-DMIBMA <sub>19</sub> )                              | 2 | 92  | 184 | 109,5 | 0,145 | 21,79 | 2,78 | 17,6 | 8,8  | 32 |
| 43 | PEG <sub>45</sub> -b-(DEAEMA <sub>77</sub> -S-DMIBMA <sub>18</sub> )                              | 2 | 95  | 190 | 109,5 | 0,145 | 22,50 | 2,83 | 19   | 9,5  | 34 |
| 44 | PEG <sub>45</sub> -b-(PDEAEMA <sub>49</sub> -co-PDMAEMA <sub>27</sub> -co-PDMIBMA <sub>24</sub> ) | 2 | 100 | 200 | 109,5 | 0,145 | 23,68 | 2,90 | 10,5 | 5,3  | 11 |
| 45 | PEG <sub>45</sub> -b-(DEAEMA <sub>78</sub> -S-DMIBMA <sub>23</sub> )                              | 2 | 101 | 202 | 109,5 | 0,145 | 23,92 | 2,92 | 16   | 8,0  | 24 |
| 46 | PEG <sub>45</sub> -b-(DEAEMA <sub>82</sub> -S-DMIBMA <sub>20</sub> )                              | 2 | 102 | 204 | 109,5 | 0,145 | 24,16 | 2,93 | 14,5 | 7,3  | 20 |
| 47 | PEG <sub>45</sub> -b-P(DEAEMA <sub>81</sub> -co-DMIBMA <sub>23</sub> )                            | 2 | 104 | 208 | 109,5 | 0,145 | 24,63 | 2,96 | 14   | 7,0  | 19 |
| 48 | PEG <sub>45</sub> -b-P(DEAEMA <sub>83</sub> -DMIBMA <sub>23</sub> )                               | 2 | 106 | 212 | 109,5 | 0,145 | 25,10 | 2,99 | 13,9 | 7,0  | 18 |
| 44 | PEG <sub>45</sub> -b-(PDEAEMA <sub>49</sub> -co-PDMAEMA <sub>31</sub> -co-PDMIBMA <sub>29</sub> ) | 2 | 109 | 218 | 109,5 | 0,145 | 25,81 | 3,03 | 11,4 | 5,7  | 12 |
| 40 | PEG <sub>45</sub> -b-P(DEAMA <sub>83</sub> -co-DMIBMA <sub>28</sub> )                             | 2 | 111 | 222 | 109,5 | 0,145 | 26,29 | 3,06 | 17,2 | 8,6  | 24 |
| 49 | PEG <sub>45</sub> -b-P(DEAEMA <sub>89</sub> -S-DMIBMA <sub>24</sub> )                             | 2 | 113 | 226 | 109,5 | 0,145 | 26,76 | 3,08 | 15   | 7,5  | 19 |
| 49 | PEG <sub>45</sub> -b-P(DMEAEMA <sub>45</sub> -DEAEMA <sub>45</sub> -DMIBMA <sub>24</sub> )        | 2 | 114 | 228 | 109,5 | 0,145 | 27,00 | 3,10 | 14   | 7,0  | 16 |
| 39 | PEG <sub>45</sub> -b-P(FcMA <sub>19</sub> -co-DEAEMA <sub>83</sub> -co-DMIBMA <sub>33</sub> )     | 2 | 135 | 270 | 109,5 | 0,145 | 31,97 | 3,37 | 13   | 6,5  | 11 |
| 50 | N3-PEG <sub>77,5</sub> -b-P(DEAEMA <sub>130</sub> -co-DMIBMA <sub>32</sub> )                      | 2 | 162 | 324 | 109,5 | 0,145 | 38,37 | 3,69 | 25,9 | 13,0 | 27 |

#### Polymes from PISA

|    |                                                                       |   |      |      |       |       |        |      |      |      |    |
|----|-----------------------------------------------------------------------|---|------|------|-------|-------|--------|------|------|------|----|
| 51 | PEG <sub>113</sub> -b-P(HPMA <sub>320</sub> -co-GlyMA <sub>80</sub> ) | 2 | 400  | 800  | 109,5 | 0,145 | 94,73  | 5,80 | 27,9 | 14,0 | 9  |
| 52 | PEG <sub>113</sub> -b-PHPMA <sub>400</sub>                            | 2 | 400  | 800  | 109,5 | 0,145 | 94,73  | 5,80 | 25   | 12,5 | 8  |
| 53 | PGMA <sub>59</sub> -PHPMA <sub>400</sub>                              | 2 | 400  | 800  | 109,5 | 0,145 | 94,73  | 5,80 | 28   | 14,0 | 9  |
| 54 | PGMA <sub>62</sub> -PHPMA <sub>600</sub>                              | 2 | 600  | 1200 | 109,5 | 0,145 | 142,10 | 7,11 | 42,7 | 21,4 | 11 |
| 54 | PGMA <sub>62</sub> -PHPMA <sub>700</sub>                              | 2 | 700  | 1400 | 109,5 | 0,145 | 165,78 | 7,68 | 50   | 25,0 | 11 |
| 54 | PGMA <sub>62</sub> -PHPMA <sub>800</sub>                              | 2 | 800  | 1600 | 109,5 | 0,145 | 189,46 | 8,21 | 53,4 | 26,7 | 10 |
| 54 | PGMA <sub>62</sub> -PHPMA <sub>900</sub>                              | 2 | 900  | 1800 | 109,5 | 0,145 | 213,14 | 8,70 | 59,8 | 29,9 | 10 |
| 54 | PGMA <sub>62</sub> -PHPMA <sub>1000</sub>                             | 2 | 1000 | 2000 | 109,5 | 0,145 | 236,83 | 9,18 | 70,2 | 35,1 | 11 |

#### Triblock-Copolymers

##### ABA-Triblock

|    |                                                                        |   |     |     |       |       |       |      |      |      |     |
|----|------------------------------------------------------------------------|---|-----|-----|-------|-------|-------|------|------|------|-----|
| 55 | PEG <sub>22</sub> -b-P(S-stat-CMA) <sub>118</sub> -b-PEG <sub>22</sub> | 2 | 118 | 236 | 109,5 | 0,145 | 27,95 | 3,15 | 14   | 14,0 | 44  |
| 55 | PEG <sub>45</sub> -b-P(S-stat-CMA) <sub>206</sub> -b-PEG <sub>45</sub> | 2 | 206 | 412 | 109,5 | 0,145 | 48,79 | 4,16 | 21   | 21,0 | 38  |
| 20 | PMOXA <sub>3</sub> -PDMS <sub>19</sub> -PMOXA <sub>3</sub>             | 2 | 19  | 38  | 126,5 | 0,162 | 5,50  | 1,98 | 6    | 6,0  | 114 |
| 20 | PMOXA <sub>6</sub> -PDMS <sub>34</sub> -PMOXA <sub>6</sub>             | 2 | 34  | 68  | 126,5 | 0,162 | 9,84  | 2,65 | 9,2  | 9,2  | 91  |
| 20 | PMOXA <sub>6</sub> -PDMS <sub>44</sub> -PMOXA <sub>6</sub>             | 2 | 44  | 88  | 126,5 | 0,162 | 12,73 | 3,02 | 10,7 | 10,7 | 79  |
| 20 | PMOXA <sub>7</sub> -PDMS <sub>49</sub> -PMOXA <sub>7</sub>             | 2 | 49  | 98  | 126,5 | 0,162 | 14,18 | 3,18 | 12,1 | 12,1 | 81  |
| 20 | PMOXA <sub>12</sub> -PDMS <sub>63</sub> -PMOXA <sub>12</sub>           | 2 | 63  | 126 | 126,5 | 0,162 | 18,23 | 3,61 | 13,4 | 13,4 | 67  |

|                                                                 |   |    |     |       |       |       |      |      |      |    |
|-----------------------------------------------------------------|---|----|-----|-------|-------|-------|------|------|------|----|
| 56 PMOXA <sub>17</sub> -PDMS <sub>67</sub> -PMOXA <sub>17</sub> | 2 | 67 | 134 | 126,5 | 0,162 | 19,38 | 3,72 | 11,7 | 11,7 | 51 |
| 20 PMOXA <sub>12</sub> -PDMS <sub>87</sub> -PMOXA <sub>12</sub> | 2 | 87 | 174 | 126,5 | 0,162 | 25,17 | 4,24 | 16,2 | 16,2 | 57 |
| 56 PVCL <sub>10</sub> -PDMS <sub>65</sub> -PVCL <sub>10</sub>   | 2 | 65 | 130 | 126,5 | 0,162 | 18,81 | 3,66 | 14,6 | 14,6 | 72 |
| 57 PEG <sub>16P</sub> PPS <sub>50</sub> PEG <sub>16</sub>       | 3 | 50 | 150 | 109,5 | 0,162 | 19,84 | 2,81 | 8    | 8,0  | 30 |

#### ABC-Triblock

|                                                                       |   |     |     |       |       |       |      |      |      |    |
|-----------------------------------------------------------------------|---|-----|-----|-------|-------|-------|------|------|------|----|
| 58 PEG <sub>45</sub> -PDPA <sub>85</sub> -PSS <sub>22</sub>           | 2 | 85  | 170 | 109,5 | 0,145 | 20,13 | 2,68 | 13,9 | 13,9 | 64 |
| 17 PEO <sub>45</sub> -b-PEHO <sub>48</sub> -b-PtEtOz <sub>10</sub>    | 3 | 48  | 144 | 109,5 | 0,145 | 17,05 | 2,46 | 6,3  | 6,3  | 26 |
| 17 PEO <sub>45</sub> -b-PEHO <sub>65</sub> -b-PtEtOz <sub>19</sub>    | 3 | 65  | 195 | 109,5 | 0,145 | 23,09 | 2,87 | 7,8  | 7,8  | 24 |
| 17 PEO <sub>45</sub> -b-PEHO <sub>62</sub> -b-PtEtOz <sub>35</sub>    | 3 | 62  | 186 | 109,5 | 0,145 | 22,02 | 2,80 | 8,2  | 8,2  | 28 |
| 17 PEO <sub>45</sub> -b-PEHO <sub>87</sub> -b-PtEtOz <sub>10</sub>    | 3 | 97  | 291 | 109,5 | 0,145 | 34,46 | 3,50 | 9,9  | 9,9  | 21 |
| 17 PEO <sub>45</sub> -b-PEHO <sub>139</sub> -b-PtEtOz <sub>10</sub>   | 3 | 139 | 417 | 109,5 | 0,145 | 49,38 | 4,19 | 12,9 | 12,9 | 19 |
| 59 PEG <sub>42</sub> -b-PAGE <sub>COOH12</sub> -b-PtBGE <sub>22</sub> | 3 | 12  | 36  | 109,5 | 0,145 | 4,26  | 1,23 | 4,1  | 4,1  | 95 |
